# Supplementary material
Source: Research Square preprint supplement (doi:10.21203/rs.3.rs-9106877/v1)
Supplement: Supplementary file 1 [file 03b2b05808dc2d359c3333d8.docx]

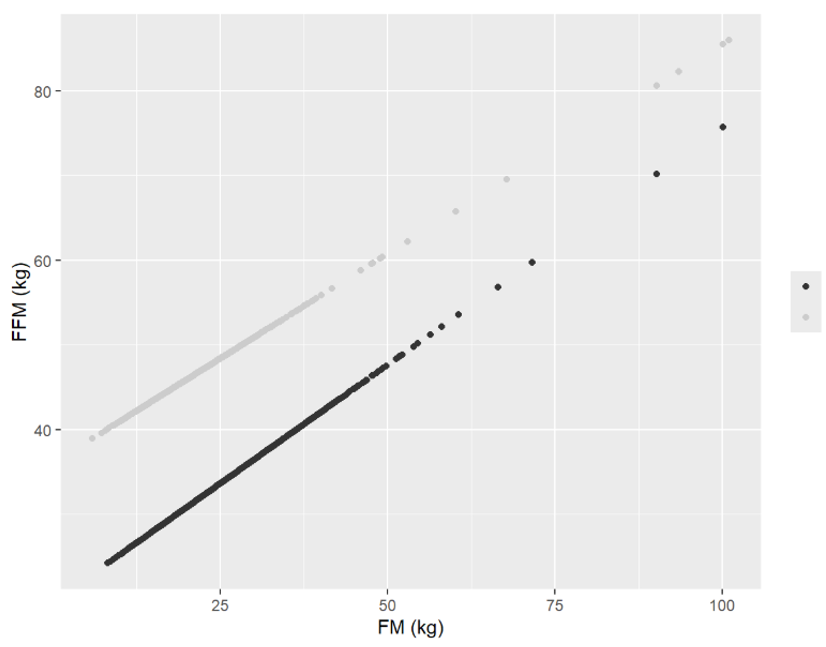


Women

Men

**Supplementary Figure 1:** Predicted fat-free mass values ​​according to fat mass and sex to define sarcopenia by the new criterion

FFM: fat-free mass; FM: fat mass
