# Supplementary material
Source: Research Square preprint supplement (doi:10.21203/rs.3.rs-9106877/v1)
Supplement: Supplementary file 2 [file 285f8eac0d5cb0b3431b9366.docx]

**Supplementary Table 1:** Comparison of characteristics between subjectsincluded and excluded from the analysis

|  |  | **Overall** | **Included**  **n = 1838** | **Excluded**  **n = 647** |  |
| --- | --- | --- | --- | --- | --- |
|  | **n** | **Mean (SD)** | | | **P-value** |
| **Age (years)** | 2485 | 52.9 (15.5) | 51.8 (14.7) | 56.0 (17.1) | < 0.001 |
|  |  | **n (%)** | | | **P-value** |
| **Sex**  Women  Men | 2485 | 1539 (61.9)  946 (38.1) | 1145 (62.3)  693 (37.7) | 394 (60.9)  253 (39.1) | 0.53 |
| **Education (years)** | 2482 |  |  |  |  |
| 0 – 6  7 – 9  10 – 12  > 12 |  | 1165 (46.9)  348 (14.0)  320 (12.9)  649 (26.1) | 804 (43.8)  274 (14.9)  249 (13.6)  508 (27.7) | 361 (55.8)  74 (11.4)  71 (11.0)  141 (21.8) | < 0.001 |

SD: standard deviation; n: number
